# Supplementary material for: New Species-Specific Real-Time PCR Assays for Colletotrichum Species Causing Bitter Rot of Apple
Source: MDPI journal article supplement (doi:10.3390/microorganisms12050878), 2024-04-27
Supplement: s1 [file s1]

**Table S1.** List of GenBank accessions used to assess areas of DNA polymorphism among *Colletotrichum* spp. (n=1,487). Available as a Microsoft Office Excel spreadsheet.

**Table S2.** Highest annealing temperature (°C) at which target and non-target species amplified for each primer-probe set (— = never amplified at any temperature). Target amplifications are in **bold**.

| Taxon                                                 | CHLAD     | FICAL     | FRLAD     | GLG       | HEAP      | NOLAD     | NYMG      | SIAP      | THTUB     |
|-------------------------------------------------------|-----------|-----------|-----------|-----------|-----------|-----------|-----------|-----------|-----------|
| <i>Colletotrichum acutatum</i> species complex        |           |           |           |           |           |           |           |           |           |
| <i>C. acutatum</i> s.s.                               | —         | 60        | —         | —         | —         | —         | —         | —         | —         |
| <i>C. fioriniae</i>                                   | 72        | <b>69</b> | —         | —         | —         | —         | 69        | —         | —         |
| <i>C. godetiae</i>                                    | —         | —         | —         | —         | —         | —         | —         | —         | —         |
| <i>C. johnstonii</i>                                  | —         | —         | —         | —         | —         | —         | —         | —         | —         |
| <i>C. lupini</i>                                      | —         | —         | —         | —         | —         | —         | 69        | —         | —         |
| <i>C. nymphaeae</i>                                   | —         | 67        | —         | —         | —         | 68        | <b>69</b> | —         | —         |
| <i>C. pyricola</i>                                    | —         | —         | —         | —         | —         | —         | —         | —         | —         |
| <i>C. salicis</i>                                     | —         | —         | —         | —         | —         | —         | —         | —         | —         |
| <i>Colletotrichum gloeosporioides</i> species complex |           |           |           |           |           |           |           |           |           |
| <i>C. chrysophilum</i>                                | <b>72</b> | 67        | 70        | 65        | —         | —         | —         | —         | —         |
| <i>C. fructicola</i>                                  | 72        | —         | <b>70</b> | —         | —         | —         | —         | —         | —         |
| <i>C. gloeosporioides</i> s.s.                        | 68        | 67        | 68        | <b>68</b> | —         | —         | —         | —         | —         |
| <i>C. henanense</i>                                   | 70        | —         | 68        | —         | <b>65</b> | —         | —         | —         | —         |
| <i>C. kahawae</i> clade                               | 68        | —         | —         | —         | —         | —         | —         | —         | —         |
| <i>C. noveboracense</i>                               | —         | —         | —         | 67        | —         | <b>68</b> | —         | —         | —         |
| <i>C. siamense</i>                                    | 68        | —         | 68        | 67        | —         | —         | 69        | <b>70</b> | —         |
| <i>C. theobromicola</i>                               | 72        | —         | —         | —         | —         | —         | —         | —         | <b>65</b> |
| Other fungi                                           |           |           |           |           |           |           |           |           |           |
| <i>Botryosphaeria dothidea</i>                        | —         | —         | —         | —         | —         | —         | —         | —         | —         |
| <i>Diaporthe</i> sp.                                  | —         | 67        | —         | —         | —         | —         | —         | —         | —         |
| <i>Diplocarpon coronariae</i>                         | —         | —         | —         | —         | —         | —         | —         | —         | —         |
| <i>Erysiphe necator</i>                               | —         | —         | —         | —         | —         | —         | —         | —         | —         |
| <i>Neonectria ditissima</i>                           | —         | —         | —         | —         | —         | —         | —         | —         | —         |
| <i>Penicillium expansum</i>                           | —         | —         | —         | —         | —         | —         | —         | —         | —         |
| <i>Pestalotiopsis maculans</i>                        | —         | —         | —         | —         | —         | —         | —         | —         | —         |
| <i>Phomopsis viticola</i>                             | —         | —         | —         | —         | —         | —         | —         | —         | —         |
| <i>Plasmopara viticola</i>                            | —         | —         | —         | —         | —         | —         | —         | —         | —         |
| Plants                                                |           |           |           |           |           |           |           |           |           |
| <i>Malus domestica</i>                                | —         | —         | —         | —         | —         | —         | —         | —         | —         |
| <i>Vitis vinifera</i>                                 | —         | —         | —         | —         | —         | —         | —         | —         | —         |

**Table S3.** Real-time PCR standard curve Cq values and effect of apple DNA on Cq (NA = no amplification during assay with apple DNA, nt = not tested because it was below LoD).

| Species                   | Primer-probe set | [DNA]<br>(ng/ $\mu$ L) | Cq mean $\pm$<br>SD | Ratio fungal<br>DNA: apple<br>DNA | Cq mean $\pm$<br>SD |
|---------------------------|------------------|------------------------|---------------------|-----------------------------------|---------------------|
| <i>C. chrysophilum</i>    | CHLAD            | 1                      | 24.09 $\pm$ 0.04    | 1:1                               | 22.92 $\pm$ 2.48    |
|                           |                  | 0.1                    | 27.44 $\pm$ 0.16    | 1:10                              | 28.81 $\pm$ 1.54    |
|                           |                  | 0.05                   | 28.35 $\pm$ 0.14    | 1:20                              | 29.31 $\pm$ 1.01    |
|                           |                  | 0.01                   | 31.07 $\pm$ 0.03    | 1:100                             | 32.74 $\pm$ 0.69    |
|                           |                  | 0.005                  | 32.52 $\pm$ 0.12    | 1:200                             | 32.28 $\pm$ 0.65    |
|                           |                  | 0.001                  | 34.77 $\pm$ 0.49    | 1:1,000                           | 38.14 $\pm$ 0.45    |
|                           |                  | 0.0005                 | 37.03 $\pm$ 1.21    | 1:2,000                           | NA                  |
|                           |                  |                        |                     |                                   |                     |
| <i>C. fioriniae</i>       | FICAL            | 1                      | 25.75 $\pm$ 0.15    | 1:1                               | 23.51 $\pm$ 0.15    |
|                           |                  | 0.1                    | 28.95 $\pm$ 0.11    | 1:10                              | 27.46 $\pm$ 0.14    |
|                           |                  | 0.05                   | 29.99 $\pm$ 0.10    | 1:20                              | 29.20 $\pm$ 0.35    |
|                           |                  | 0.01                   | 32.28 $\pm$ 0.37    | 1:100                             | 32.15 $\pm$ 0.63    |
|                           |                  | 0.005                  | 34.00 $\pm$ 0.22    | 1:200                             | 37.46 $\pm$ 0.27    |
|                           |                  | 0.001                  | 35.92 $\pm$ 0.29    | 1:1,000                           | 37.38 $\pm$ 0.00    |
|                           |                  | 0.0005                 | 36.85 $\pm$ 0.39    | 1:2,000                           | 36.41 $\pm$ 0.00    |
|                           |                  |                        |                     |                                   |                     |
| <i>C. fructicola</i>      | FRLAD            | 1                      | 32.31 $\pm$ 0.17    | 1:1                               | 31.15 $\pm$ 0.07    |
|                           |                  | 0.1                    | 34.95 $\pm$ 0.76    | 1:10                              | 34.27 $\pm$ 0.29    |
|                           |                  | 0.05                   | 36.08 $\pm$ 0.66    | 1:20                              | 35.35 $\pm$ 0.21    |
|                           |                  | 0.01                   | 38.09 $\pm$ 0.74    | 1:100                             | 38.37 $\pm$ 1.52    |
|                           |                  | 0.005                  | 39.32 $\pm$ 0.83    | 1:200                             | 37.62 $\pm$ 0.00    |
|                           |                  | 0.001                  | NA                  | 1:1,000                           | nt                  |
|                           |                  | 0.0005                 | NA                  | 1:2,000                           | nt                  |
|                           |                  |                        |                     |                                   |                     |
| <i>C. gloeosporioides</i> | GLG              | 1                      | 22.35 $\pm$ 0.22    | 1:1                               | 22.58 $\pm$ 0.20    |
|                           |                  | 0.1                    | 25.92 $\pm$ 0.18    | 1:10                              | 25.65 $\pm$ 0.30    |
|                           |                  | 0.05                   | 26.45 $\pm$ 0.28    | 1:20                              | 26.58 $\pm$ 0.55    |
|                           |                  | 0.01                   | 28.2 $\pm$ 0.17     | 1:100                             | 29.99 $\pm$ 0.39    |
|                           |                  | 0.005                  | 29.16 $\pm$ 0.34    | 1:200                             | 31.51 $\pm$ 0.70    |
|                           |                  | 0.001                  | 31.57 $\pm$ 0.55    | 1:1,000                           | NA                  |
|                           |                  | 0.0005                 | 31.90 $\pm$ 0.52    | 1:2,000                           | NA                  |
|                           |                  |                        |                     |                                   |                     |
| <i>C. henanense</i>       | HEAP             | 1                      | 23.54 $\pm$ 0.14    | 1:1                               | 22.83 $\pm$ 0.12    |
|                           |                  | 0.1                    | 27.06 $\pm$ 0.15    | 1:10                              | 26.60 $\pm$ 0.18    |
|                           |                  | 0.05                   | 27.86 $\pm$ 0.22    | 1:20                              | 27.48 $\pm$ 0.17    |
|                           |                  | 0.01                   | 30.85 $\pm$ 0.23    | 1:100                             | 31.58 $\pm$ 0.26    |
|                           |                  | 0.005                  | 31.32 $\pm$ 0.14    | 1:200                             | 31.32 $\pm$ 0.60    |
|                           |                  | 0.001                  | 34.40 $\pm$ 1.01    | 1:1,000                           | 34.41 $\pm$ 0.52    |
|                           |                  | 0.0005                 | 34.89 $\pm$ 0.48    | 1:2,000                           | 34.87 $\pm$ 0.18    |
|                           |                  |                        |                     |                                   |                     |

|                         |       |                    |              |         |              |
|-------------------------|-------|--------------------|--------------|---------|--------------|
| <i>C. noveboracense</i> | NOLAD | 1                  | 25.30 ± 0.86 | 1:1     | 25.10 ± 0.46 |
|                         |       | 0.1                | 29.11 ± 0.14 | 1:10    | 28.67 ± 0.25 |
|                         |       | 0.05               | 30.48 ± 0.17 | 1:20    | 29.86 ± 0.26 |
|                         |       | 0.01               | 32.64 ± 0.31 | 1:100   | 32.08 ± 0.26 |
|                         |       | 0.005              | 33.96 ± 0.28 | 1:200   | 33.53 ± 0.47 |
|                         |       | 0.001              | 36.22 ± 0.31 | 1:1,000 | 34.94 ± 0.00 |
|                         |       | 0.0005             | 36.73 ± 1.22 | 1:2,000 | nt           |
|                         |       | <i>P</i> = 0.05563 |              |         |              |
| <i>C. nymphaeae</i>     | NYMG  | 1                  | 23.84 ± 0.31 | 1:1     | 23.58 ± 0.10 |
|                         |       | 0.1                | 27.03 ± 0.06 | 1:10    | 27.22 ± 0.06 |
|                         |       | 0.05               | 28.33 ± 0.09 | 1:20    | 28.22 ± 0.13 |
|                         |       | 0.01               | 30.72 ± 0.42 | 1:100   | 30.79 ± 0.27 |
|                         |       | 0.005              | 31.94 ± 0.34 | 1:200   | 33.16 ± 0.53 |
|                         |       | 0.001              | 35.40 ± 2.46 | 1:1,000 | 35.36 ± 0.45 |
|                         |       | 0.0005             | 36.53 ± 1.08 | 1:2,000 | NA           |
|                         |       | <i>P</i> = 0.44967 |              |         |              |
| <i>C. siamense</i>      | SIAP  | 1                  | 23.72 ± 0.18 | 1:1     | 23.33 ± 0.35 |
|                         |       | 0.1                | 26.89 ± 0.44 | 1:10    | 26.63 ± 0.29 |
|                         |       | 0.05               | 27.95 ± 0.08 | 1:20    | 27.58 ± 0.24 |
|                         |       | 0.01               | 30.28 ± 0.19 | 1:100   | 31.11 ± 0.08 |
|                         |       | 0.005              | 32.08 ± 0.04 | 1:200   | 32.41 ± 0.60 |
|                         |       | 0.001              | 34.06 ± 0.93 | 1:1,000 | 35.60 ± 1.71 |
|                         |       | 0.0005             | 35.30 ± 0.81 | 1:2,000 | 35.20 ± 0.00 |
|                         |       | <i>P</i> = 0.44250 |              |         |              |
| <i>C. theobromicola</i> | THTUB | 1                  | 28.81 ± 0.17 | 1:1     | 29.35 ± 0.36 |
|                         |       | 0.1                | 31.78 ± 0.23 | 1:10    | 31.71 ± 0.50 |
|                         |       | 0.05               | 32.59 ± 0.22 | 1:20    | 33.71 ± 0.41 |
|                         |       | 0.01               | 36.41 ± 1.37 | 1:100   | 35.97 ± 0.75 |
|                         |       | 0.005              | 37.07 ± 1.36 | 1:200   | 37.44 ± 1.07 |
|                         |       | 0.001              | NA           | 1:1,000 | nt           |
|                         |       | 0.0005             | NA           | 1:2,000 | nt           |
|                         |       | <i>P</i> = 0.31748 |              |         |              |

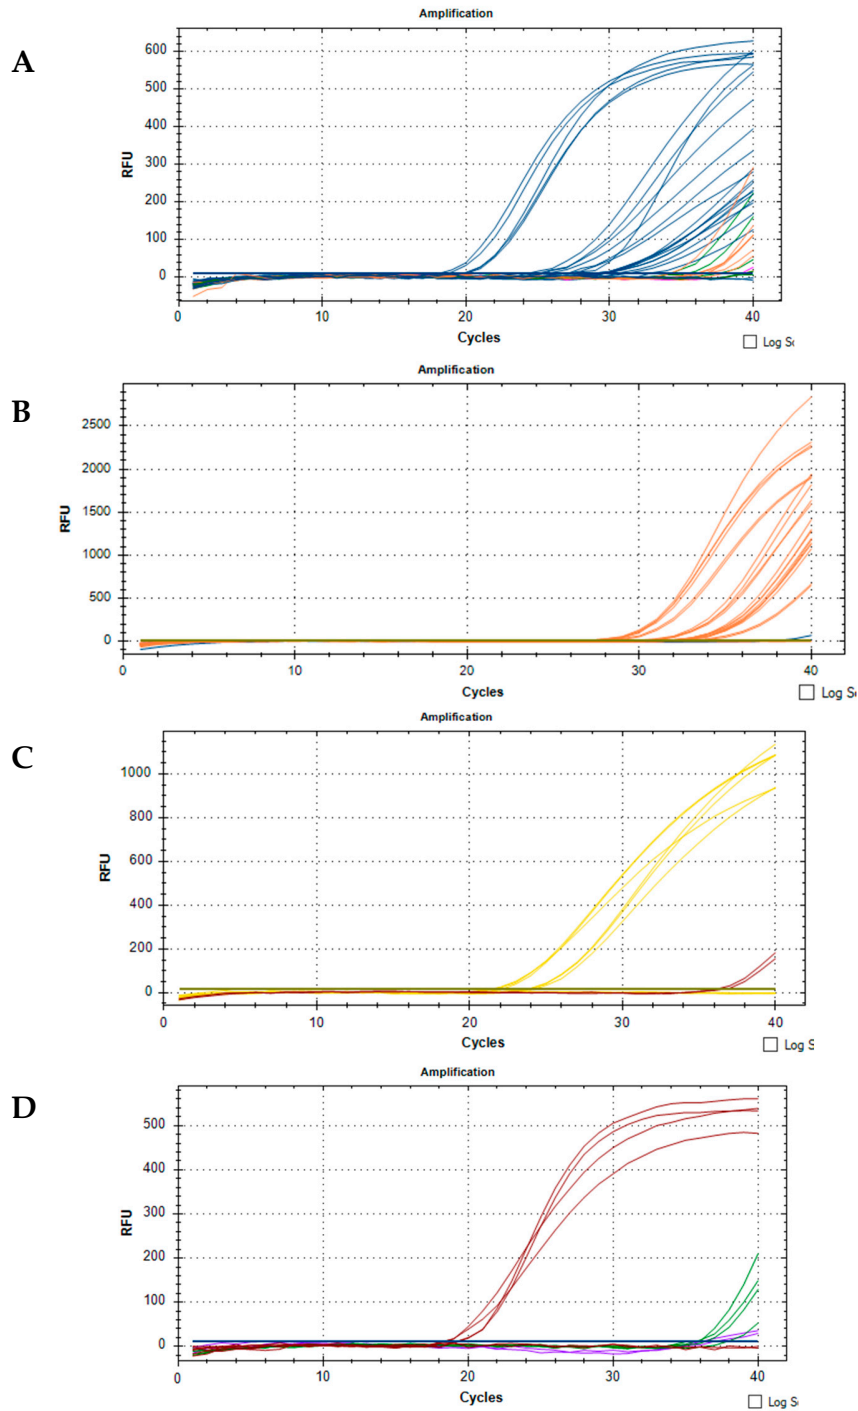

**Figure S1.** Amplification plots showing high C<sub>q</sub> values and low RFU values of non-specific amplifications: A) CHLAD primer-probe set, B) FRLAD, C) NOLAD, and D) NYMG. Blue = *C. chrysophilum* (A, B), green = *C. fioriniae* (A, D), orange = *C. fructicola* (A, B), purple = *C. lupini* (D), yellow = *C. noveboracense* (C), dark red = *C. nymphaeae* (C, D), and pink = *C. theobromicola* (A). No-template controls are in the target species color.

|                               | 5' | CHLADF2 | 22 bp  | CHLADP | 59 bp | CHLADR | 3' |
|-------------------------------|----|---------|--------|--------|-------|--------|----|
| <u><i>C. chrysophilum</i></u> |    |         |        |        |       |        |    |
| <i>C. aenigma</i>             |    |         |        |        |       |        |    |
| <i>C. camelliae</i>           |    |         |        |        |       |        |    |
| <i>C. fruticicola</i>         |    |         |        |        |       |        |    |
| <i>C. gloeosporioides</i>     |    |         |        |        |       |        |    |
| <i>C. noveboracense</i>       |    |         |        |        |       |        |    |
| <i>C. nupharicola</i>         |    |         |        |        |       |        |    |
| <i>C. siamense</i>            |    |         |        |        |       |        |    |
| <i>C. theobromicola</i>       |    |         |        |        |       |        |    |
| <i>C. tropicale</i>           |    |         |        |        |       |        |    |
| <i>C. viniferum</i>           |    |         |        |        |       |        |    |
| <u><i>C. fioriniae</i></u>    | 5' | FICALF  | 101 bp | FICALP | 3 bp  | FICALR | 3' |
| <i>C. acutatum</i>            |    |         |        |        |       |        |    |
| <i>C. aenigma</i>             |    |         |        |        |       |        |    |
| <i>C. chrysophilum</i>        |    |         |        |        |       |        |    |
| <i>C. conoides</i>            |    |         |        |        |       |        |    |
| <i>C. fruticicola</i>         |    |         |        |        |       |        |    |
| <i>C. gloeosporioides</i>     |    |         |        |        |       |        |    |
| <i>C. henanense</i>           |    |         |        |        |       |        |    |
| <i>C. hymenocallidis</i>      |    |         |        |        |       |        |    |
| <i>C. nymphaeae</i>           |    |         |        |        |       |        |    |
| <i>C. siamense</i>            |    |         |        |        |       |        |    |
| <i>C. theobromicola</i>       |    |         |        |        |       |        |    |
| <u><i>C. fruticicola</i></u>  | 5' | FRLADF2 | 22 bp  | FRLADP | 59 bp | FRLADR | 3' |
| <i>C. aenigma</i>             |    |         |        |        |       |        |    |
| <i>C. camelliae</i>           |    |         |        |        |       |        |    |
| <i>C. chrysophilum</i>        |    |         |        |        |       |        |    |
| <i>C. gloeosporioides</i>     |    |         |        |        |       |        |    |
| <i>C. noveboracense</i>       |    |         |        |        |       |        |    |
| <i>C. nupharicola</i>         |    |         |        |        |       |        |    |
| <i>C. siamense</i>            |    |         |        |        |       |        |    |

|                         |                                                                                                                                      |
|-------------------------|--------------------------------------------------------------------------------------------------------------------------------------|
| <i>C. theobromicola</i> | T- <b>ACACAT</b> CAGGAGTTTCT <b>CTTCTCGG</b> ...AACACCAGTCGCCTT <b>GACGTGG</b> ...GTCGGCG <b>GGTGACGACGAGCGAGGGGTT</b> CGGCAGC       |
| <i>C. tropicale</i>     | <b>CGTCATGACTGAAA-TCGTGGCGTGTC</b> ...AACACCAGTCGCCTT <b>GACGTGG</b> ... <b>ATCGGCCGT</b> TACC <b>ACTAGCGAAGGGTT</b> CGG <b>CAAG</b> |
| <i>C. viniferum</i>     | <b>TGTCATGACTGGAGCTTCCGAGGTCTC</b> ...AACACCAGTCGCCTT <b>GACGTGG</b> ... <b>ATCGGCCGT</b> GACCACC <b>AGTGAAGGGTT</b> CGG <b>CAAG</b> |

|                                  |                                              |      |                                            |      |                                                  |      |    |
|----------------------------------|----------------------------------------------|------|--------------------------------------------|------|--------------------------------------------------|------|----|
|                                  | 5'                                           | GLGF | 45 bp                                      | GLGP | 5 bp                                             | GLGR | 3' |
| <u><i>C. gloeosporioides</i></u> | CTCCAAGCTCGWCATGACTTCAC...                   |      | GCCGCCCGCGTTTAGTACAC...                    |      | GGCCATYATGAATTAATGCCAATTGAAATC                   |      |    |
| <i>C. aenigma</i>                | CTCCAA <b>ACT</b> CGCCATGACTTCAC...          |      | GCC <b>ACCC</b> CGCGTTT <b>GGTAAAC</b> ... |      | GGC <b>AGT</b> CATGAAT <b>GGAGG</b> CCAATTGAAACC |      |    |
| <i>C. alienum</i>                | CTCCAA <b>ACT</b> CGCCATGACTTCAC...          |      | GCC <b>ACCC</b> CGCGTTT <b>GGTAAAC</b> ... |      | GGCC <b>GTC</b> ATGAAT <b>GGAGG</b> CCAATTGAAACC |      |    |
| <i>C. aotearoa</i>               | CTCCAA <b>ACT</b> CGTCATGACT <b>CTCA</b> ... |      | GCCGCCCGC <b>ATCTGGT</b> AGAC...           |      | GG <b>CTATCTTGA</b> CTTGATGCCAATTGAAACC          |      |    |
| <i>C. camelliae</i>              | CTCCAA <b>ACT</b> CGCCATGACTTCGC...          |      | GCC <b>ACCC</b> CGCGTTT <b>GGTAAAT</b> ... |      | GGCC <b>GTC</b> ATGAAT <b>GGAGG</b> CCAATTGAAACC |      |    |
| <i>C. chrysophilum</i>           | CTCCAA <b>ACT</b> CGCCATGACTTCAC...          |      | GCC <b>ACCC</b> CGCGTTT <b>GGTAAAC</b> ... |      | GGCC <b>GTC</b> ATGAAT <b>GGAGG</b> CCAATTGAAACC |      |    |
| <i>C. conoides</i>               | CT <b>GCAA</b> <b>ACT</b> CGCCATGACTTCAC...  |      | GCC <b>ACCC</b> CGCGTTT <b>GGTAAAC</b> ... |      | GGC <b>AGT</b> CATGAAT <b>GGAGG</b> CCAATTGAAACC |      |    |
| <i>C. fructicola</i>             | CTCCAA <b>ACT</b> CGCCATGACTTCAC...          |      | GCC <b>ACCC</b> CGCGTTT <b>GGTAAAT</b> ... |      | GGCC <b>GTC</b> ATGAAT <b>GGAGG</b> CCAATTGAAACC |      |    |
| <i>C. henanense</i>              | CTCCAA <b>ACT</b> CGTCATGACT- <b>CTC</b> ... |      | GCCGCCCGC <b>ATCTGGT</b> AGAC...           |      | GG <b>CTATCTGTGA</b> CTTGATGCCAATTGAAACC         |      |    |
| <i>C. musae</i>                  | CTCCAA <b>ACT</b> CGCCATGACTTCAC...          |      | GCC <b>ACCC</b> CGCGTTT <b>GGTAAAT</b> ... |      | GGCC <b>GTC</b> ATGAAT <b>GGAGG</b> CCAATTGAAACC |      |    |
| <i>C. queenslandicum</i>         | CTCCAA <b>ACT</b> CGCCATGACTTCAC...          |      | GCC <b>ACCC</b> CGCGTTT <b>GGTAAAC</b> ... |      | GGCC <b>GTC</b> ATGAAT <b>GGAGG</b> CCAATTGAAACC |      |    |
| <i>C. siamense</i>               | CTCCAA <b>ACT</b> CGCCATGACTTCAC...          |      | GCC <b>ACCC</b> CGCGTTT <b>GGTAAAC</b> ... |      | GGCC <b>GTC</b> ATGAAT <b>GGAGG</b> CCAATTGAAACC |      |    |
| <i>C. theobromicola</i>          | CTCCAA <b>ACT</b> CGCC <b>ACT</b> ACTTCAC... |      | <b>CCCGCCTGTATTTGGCAGAC</b> ...            |      | GGCCA <b>ACATGAATTGAT</b> GCCAATTGATACC          |      |    |
| <i>C. tropicale</i>              | CTCCAA <b>AA</b> TCGCCATGACTTCAC...          |      | GCC <b>ACCC</b> CGCGTTT <b>GGTAAAT</b> ... |      | GGCC <b>GTC</b> ATGAAT <b>GGAGG</b> CCAATTGAAACC |      |    |

|                            |                                              |       |                                        |       |                              |       |    |
|----------------------------|----------------------------------------------|-------|----------------------------------------|-------|------------------------------|-------|----|
|                            | 5'                                           | HEAPF | 19 bp                                  | HEAPP | 50 bp                        | HEAPR | 3' |
| <u><i>C. henanense</i></u> | TGACTTGGTCATCGATTTCGTTCCCG...                |       | CCTTGCGCCAGAAACCAACCCACCT...           |       | CGAATCGAGAACCATCCTCGC        |       |    |
| <i>C. aenigma</i>          | <b>TCGTTCGATTC</b> ----- <b>ACTTCCCG</b> ... |       | C- <b>CTGCGCGAGAAACCAACAGACCT</b> ...  |       | <b>GGAACCAAGAATCATCCTGGA</b> |       |    |
| <i>C. aeshynomenes</i>     | <b>TCATTCGATTC</b> ----- <b>TTTGCCG</b> ...  |       | CC <b>CTGCGACCAGAAAACAACAGACCT</b> ... |       | <b>GGAACCAAGAATCATCCTGGC</b> |       |    |
| <i>C. alatae</i>           | <b>TCATCAGTTC</b> ----- <b>CATTCCCG</b> ...  |       | CC <b>CTGCGCCAGAAACCAACAGATCT</b> ...  |       | <b>TGAATCAAGAATCATCCTGGG</b> |       |    |
| <i>C. alienum</i>          | <b>TCGTTCGATTC</b> ----- <b>ACTTCCCG</b> ... |       | C- <b>CTGCGCGAGAAACCAACAGACCT</b> ...  |       | <b>GGAACCAAGAGTCATCCTGGA</b> |       |    |
| <i>C. aotearoa</i>         | <b>TCATTCGATTC</b> ----- <b>GCTTCCCG</b> ... |       | CCTTGCGCCAGAAACCAAC <b>CACACCT</b> ... |       | <b>CGAACCAAGAACCATCCTGGT</b> |       |    |
| <i>C. camelliae</i>        | <b>TCATTCGATTC</b> ----- <b>GCTTCCCG</b> ... |       | CCTTGCGCCAGAAACCC <b>CACAAACCT</b> ... |       | <b>CGAACCAAGAACCATCCTGGT</b> |       |    |
| <i>C. chrysophilum</i>     | <b>TCGTTCGATTC</b> ----- <b>ACTTCCCG</b> ... |       | C- <b>CTGCGCGAGAAACCAACAGACCT</b> ...  |       | <b>GGAACCAAGAATCATCCTGGA</b> |       |    |
| <i>C. clidemiae</i>        | <b>TCATTCGATTC</b> ----- <b>GCTTCCCG</b> ... |       | CCTTGCGCCAGAAACCC <b>CACAAACCT</b> ... |       | <b>CGAACCAAGAACCATCCTGGT</b> |       |    |
| <i>C. conoides</i>         | <b>TCGTTCGATTC</b> ----- <b>ACTTCCCG</b> ... |       | C- <b>CTGCGCGAGAAACCAACAGACCT</b> ...  |       | <b>GGAACCAAGAATCATCCTGGA</b> |       |    |
| <i>C. fructicola</i>       | <b>TCGTTCGATTC</b> ----- <b>ACTTCCCG</b> ... |       | C- <b>CTGCGCGAGAAACCAACAGACCT</b> ...  |       | <b>GGAACCAAGAATCATCCTGGA</b> |       |    |
| <i>C. gloeosporioides</i>  | <b>TCATTCGATTC</b> ----- <b>CCTTCCTA</b> ... |       | CC <b>CTGCGCCGAGAAACCAACAGACCT</b> ... |       | <b>CGAACCAAGAATCATCCTGGC</b> |       |    |
| <i>C. horii</i>            | <b>TCGTTCGATTC</b> ----- <b>CCTTCCCG</b> ... |       | <b>CTCTGCGCCAGAGATCAAAAAACCT</b> ...   |       | <b>CAAACCGAGAACCATCCTGGA</b> |       |    |
| <i>C. jiangxiense</i>      | <b>TCATTCGATTC</b> ----- <b>GCTTCCCG</b> ... |       | CCTTGCGCCAGAAACCC <b>CACAAACCT</b> ... |       | <b>CGAACCAAGAACCATCCTGGT</b> |       |    |
| <i>C. musae</i>            | <b>TCGTTCGATTC</b> ----- <b>ACTTCCCG</b> ... |       | C- <b>CTGCGCGAGAAACCAACAGACCT</b> ...  |       | <b>GGAACCAAGAATCATCCTGGA</b> |       |    |

|                          |                                                                             |
|--------------------------|-----------------------------------------------------------------------------|
| <i>C. noveboracense</i>  | TCGTCGATTC-----ACTTCCCG...C-CTGCGCGAGAAACCAACAGACCT...GGAACCAAGAATCATCCTGGA |
| <i>C. perseae</i>        | TCGTCGATTC-----ACTTCCCG...C-CTGCGCGAGAAACCAACAGACCT...GGAACCAAGAATCATCCTGGA |
| <i>C. psidii</i>         | TCATCGATTC-----GCTTCGCG...CCTTGCGCCAGAAACCCACAAACCT...CGAACCAAGAACCATCCTGGT |
| <i>C. queenslandicum</i> | TCATCGATTC-----CCTTCCCG...CCCTGCGCCAGAAACCAATAGACCT...GGACCCAAGAATCATCCTGGC |
| <i>C. salsolae</i>       | CCATCGATTT-----CCTTCCCG...CCCTGCGCCAGAAACCAACAGACCT...GGAACCAAGAATCATCCTGGC |
| <i>C. siamense</i>       | CCATCGATTC-----CCTTCCCG...CCCTGCGCCAGAAACCAACAGACCT...GGAACCAAGAATCATCCTGGC |
| <i>C. theobromicola</i>  | CCAGCAACGC-----CCTTCCCG...CTCCGTGACAGAAACCAACGGGCGT...CAAATCACAACCCACTTGGC  |
| <i>C. ti</i>             | TCATCGATTC-----GCTTCCCG...CCTTGTGCCAGAAACCAACACACCT...CGAACCAAGAACCATCCTGGT |
| <i>C. tropicale</i>      | TCATCGATTC-----CCTTCTCG...CCCTGCGCCAGAGACCAACGGGCCT...CGAACCAAGAATCATCCTGGT |
| <i>C. viniferum</i>      | TCGTCGATTC-----ACTTCCCG...C-CTGCGCGAGAAACCAACAGACCT...GGAACCAAGAATCATCCTGGA |
| <i>C. xanthorrhoeae</i>  | TCATCGATTC-----CCTTCCCG...CTCTGCGCCAGAAACCAACAGACCT...CAAATCAAGAACCATCCTGGT |

|                                | 5'                           | NOLADF                          | 2 bp                        | NOLADP | 280 bp | NOLADR | 3' |
|--------------------------------|------------------------------|---------------------------------|-----------------------------|--------|--------|--------|----|
| <u><i>C. noveboracense</i></u> | GGGGAAGTA-TAGTCAGCGCATTG...  | CGTCATGACTGGAATTTGTGATGTTCC...  | GTCTGAACGAACGAGAGACGGCGATTA |        |        |        |    |
| <i>C. aenigma</i>              | AACGAGGGA-CTGTCAGCGAATTG...  | TGTCATGACTGGAGCTTCCGAGGTCTC...  | GTCTGAACGAACGAGAGACGGCGATTA |        |        |        |    |
| <i>C. camelliae</i>            | GACGAGAGAATTGTCAGCGCATTG...  | CGTCGTGACTGGAACCTCCGAGATCTG...  | GCCGAGCGAACGAGAGACGACAAATA  |        |        |        |    |
| <i>C. chrysophilum</i>         | GACGAGAGG-TTGTTCAGCGCATTG... | CATCGTGCTGTAATTTTGATGTTTC...    | ATCGAGCGAAGGAGAGACGACAAATC  |        |        |        |    |
| <i>C. fructicola</i>           | AACGAGGGA-CTGTCAGCGCATTG...  | TCTCATGACAGGAGCTTCCGAGATTTTC... | ACCGGGCGAAGGAGGGACGACAAATC  |        |        |        |    |
| <i>C. gloeosporioides</i>      | GACGAGAGG-TTGTTCAGCGCATTG... | CGTCATGACTGAAA-TTGTGGTGCTTC...  | ATCGAGCGAACGAGAGACGACGAGTTC |        |        |        |    |
| <i>C. nupharicola</i>          | GGGGAAGTA-TAGTCAGCGCATTG...  | CGTCATGACTGGAATTTGTGATGTTCC...  | GTCTGAACGAACGAGAGACGGCGATTA |        |        |        |    |
| <i>C. siamense</i>             | GACGAGAAG-TTGTTCAGCGCATTG... | CGTCATGACTGAAA-TTGTGGCGTTTC...  | ATCGACCGAACGAGAGACGACGAATC  |        |        |        |    |
| <i>C. theobromicola</i>        | GAGAGGGATGTTGTCAGCGCATTG...  | T-ACACATCAGGAGTTTCTCTTCTCGG...  | GTCTGAACGAACGAGAGACGACGGATG |        |        |        |    |
| <i>C. tropicale</i>            | GACGAGAAG-TTGTTCAGCGCATTG... | CGTCATGACTGAAA-TCGTGGCGTGTC...  | ATCGAGCGAAGGAGGGACGACGAATA  |        |        |        |    |
| <i>C. viniferum</i>            | AACAAGGGA-CTGTCAGCGGATTG...  | TGTCATGACTGGAGCTTCCGAGGTCTC...  | ATCGACCGAGCGAGAGACGATGAATC  |        |        |        |    |

|                            | 5'                             | NYMGF                           | 54 bp                    | NYMGP | 24 bp | NYMGR | 3' |
|----------------------------|--------------------------------|---------------------------------|--------------------------|-------|-------|-------|----|
| <u><i>C. nymphaeae</i></u> | GATAACACCAGCTTCGTCGATAT--C...  | GATTGGGC---TTGTTGTAACGACACG...  | GCCGAGACAAAATTGCTGACAGA  |       |       |       |    |
| <i>C. acutatum</i>         | GATAACACCAGCTTCGTCGGTAC--C...  | GATTGGGC---TCGTTGTAATGATGCG...  | GCCGAGACAAAATTTGCTGACAGA |       |       |       |    |
| <i>C. cuscatae</i>         | GATAACACCAGCTTCGTCATAT--C...   | GATTGGGC---TTGTTGTAACAACACG...  | GCCGAGACAAAATTGCTGACAGA  |       |       |       |    |
| <i>C. fioriniae</i>        | AATAACACCAGCTTCATCGGTAA--C...  | GATTGGGCTCGTTGTTGTAATGATACG...  | GCCCAACAAAATTTGCTGACAGA  |       |       |       |    |
| <i>C. kinghornii</i>       | ACGATAACACCACCCTACTCGGTAAAC... | GATTGGGC---TCGTTGCAATGGCACG...  | CCCAAGACAAAATTTGCTGACAGA |       |       |       |    |
| <i>C. kniphofiae</i>       | GATAACACCACCCCAATCGGTAA--C...  | GATTGGGC---TTGTTGCAATGGCACAC... | TCCCAAGAAAAATTATTAACAG   |       |       |       |    |
| <i>C. lupini</i>           | GATAACACCAGCTTCGTCGGTAC--C...  | GATTGGGC---TTGTTGTAATGACACG...  | GCCGAGACAAAATTGCTGACAGA  |       |       |       |    |
| <i>C. orientalis</i>       | AATAACACCAGCTTCATCGGTAA--C...  | GATTGGGCTCGTTGTTGTAATGATACG...  | GCCCAACAAAATTTGCTGACAGA  |       |       |       |    |
| <i>C. pyricola</i>         | GATAACACCATCCTAATCGGTAA--C...  | GATTGGGC---TCGTTGCAATGGCAAG...  | TCCGAGACAAAATTTGCTGACAGA |       |       |       |    |
| <i>C. scovillei</i>        | GATAACACCAGCTTCGTCGATAT--C...  | GATTGGGC---TTGTTGTAACGACACG...  | GCCGAGACAAAATTTGCTGACAGA |       |       |       |    |

|                           | 5' | SIAPF                                                                                          | 1 bp | SIAPP | 96 bp | SIAPR | 3' |
|---------------------------|----|------------------------------------------------------------------------------------------------|------|-------|-------|-------|----|
| <u><i>C. siamense</i></u> |    | ACTGATATCGGCGCTGCCAG . . . CGACCTAAGGTTGTCTTTGTGTCCTAG . . . CACATCTGGCCATCGATTCC-----CCTTC    |      |       |       |       |    |
| <i>C. aenigma</i>         |    | ATAGATATCGGCGCTGCCAG . . . CCACCTTAGGTCGTCTTTGTGTTCTAG . . . CGCATCTGGTCGTCGATTCC-----ACTTC    |      |       |       |       |    |
| <i>C. aeschynomenes</i>   |    | ACCGATATCGGCGCTGCCAG . . . CGACCTCAGGTTGTCTTTGTGTCCTAG . . . CACATCTGGTCATCGATTCC-----TTTG     |      |       |       |       |    |
| <i>C. alatae</i>          |    | ACCGATATCGGCGCTGTTAG . . . CGACATGAAGCTGTCTCTATGTCCTAG . . . CGCATCTGATCATCAGTTCC-----CATTC    |      |       |       |       |    |
| <i>C. alienum</i>         |    | ATAGATATCGGCGCTGCCAA . . . CGACTTTAGGTCGTCTTTGTGTTCTAG . . . CGCATCTGGTCGTCGATTCC-----ACTTC    |      |       |       |       |    |
| <i>C. aotearoa</i>        |    | ACCGATATCGGCGCTGCTAG . . . CGACATTAGGTTGTCTTTGTATCCTAG . . . AAGATCTGGTCATCGATTCC-----GCTTC    |      |       |       |       |    |
| <i>C. camelliae</i>       |    | ACCGATATCGGCGCTGCTAG . . . CGACATTAGGTTGTCTTTGTATCCTAG . . . AAGATCTGGTCATCGATTCC-----GCTTC    |      |       |       |       |    |
| <i>C. chrysophilum</i>    |    | ATAGATATCGGCGCTGCCAA . . . CGACTTTAGGTCGTCTTTGTGTTCTAG . . . CGCATCTGTTGTCGTCGATTCC-----ACTTC  |      |       |       |       |    |
| <i>C. clidemiae</i>       |    | ACCGATATCGGCGCTGCTAG . . . CGACATTAGTTTGTCTTTGTATCCTAG . . . AAGATCTGGTCATCGATTCC-----GCTTC    |      |       |       |       |    |
| <i>C. conoides</i>        |    | ATAGATATCGGCGCTGCCAG . . . CGACTTTAGGTCGTCTTTGTGTTCTAG . . . CGCATCTGTTGTCGTCGATTCC-----ACTTC  |      |       |       |       |    |
| <i>C. fruticicola</i>     |    | ATAGATATCGGCGCTGCCAA . . . CGACTTTAGGTCGTCTTTGTGTTCTAG . . . CGCATCTGTTGTCGTCGATTCC-----ACTTC  |      |       |       |       |    |
| <i>C. gloeosporioides</i> |    | ACCGATATCGGCGCTGCCAG . . . CCACCTTAGGTTGTCTTTGTGCCCTTG . . . TGCATCTGGTCATCGATTCC-----CCTTC    |      |       |       |       |    |
| <i>C. henanense</i>       |    | ACCGATATCGACGCTACTTG . . . CGGCATCAGGTGGTCTTTTATCCTAG . . . AACATCTGGTGACTTGGTCATCGATTCCGCTTC  |      |       |       |       |    |
| <i>C. horii</i>           |    | ACCGATAGCGGCGCTGCTAG . . . CGACATGAGAATGTGTTGTATCC-AG . . . CGCATCTGGTCGTCGATTCC-----CCTTC     |      |       |       |       |    |
| <i>C. jiangxiense</i>     |    | ACCGATAGCGGCGCTGCTAG . . . CGACATTAGGTTGTCTTTGTATCCTAG . . . AAGATCTGGTCATCGATTCC-----GCTTC    |      |       |       |       |    |
| <i>C. musae</i>           |    | ATAGATATCGGCGCTGCCAG . . . CGACTCTAGGTCGTCTTTGTGTTCTAG . . . CGCACCTGGTCGTCGATTCC-----ACTTC    |      |       |       |       |    |
| <i>C. noveboracense</i>   |    | ATAGATATCGGCGCTGCCAA . . . CGACTTTAGGTCGCCCTTTGTGTTCTAG . . . CGCATCTGTTGTCGTCGATTCC-----ACTTC |      |       |       |       |    |
| <i>C. perseae</i>         |    | ATAGATATCGGCGCTGCCAG . . . CGACTTTAGGTCGTCTTTGTGTTCTAG . . . CGCACCTGGTCGTCGATTCC-----ACTTC    |      |       |       |       |    |
| <i>C. psidii</i>          |    | ACCGATATCGGCGCTGCTAC . . . CGACATTAGTTTGTCTTTGTATCCTAG . . . AAGATCTGGTCATCGATTCC-----GCTTC    |      |       |       |       |    |
| <i>C. queenslandicum</i>  |    | ACCGATATCGACGCTGCCAG . . . CAACCTCAAGTTGTCTTTATGTCCTAG . . . CACATCTGGTCATCGATTCC-----CCTTC    |      |       |       |       |    |
| <i>C. salsolae</i>        |    | ACTGATATCGGCGCTGCCAG . . . CGACCTCAGGTTGTCTTTGTGTCCTAG . . . CACATCTGGCCATCGATTTC-----CCTTC    |      |       |       |       |    |
| <i>C. theobromicola</i>   |    | ACTAATGTCCGCGCAACTAG . . . CGACATTGGGTTGTCTTTGTATCCCAT . . . CGCCTCTGGCCAGCAACGC-----CCTTC     |      |       |       |       |    |
| <i>C. ti</i>              |    | ACCGATATCGGCGCTGCCAG . . . CGCCATTAGGTTGTCTTTGTATCCTAG . . . AAGATCTGGTCATCGATTCC-----GCTTC    |      |       |       |       |    |
| <i>C. tropicale</i>       |    | ATCGACATCGGCGCTGCTAG . . . CGACCTCAGGCTGTCTTTGTGTCCTAG . . . CGCATCTGCTCATCGATTCC-----CCTTC    |      |       |       |       |    |
| <i>C. viniferum</i>       |    | ATAGATATCGGCGCTGCCAG . . . CCACCTCAGGTCGTCTTTGTGTTCTAG . . . CGCATCTGGTCGTCGATTCC-----ACTTC    |      |       |       |       |    |
| <i>C. xanthorrhoeae</i>   |    | ACCGATATCGGCGCTGCTAG . . . CGACATTGGGCTGTCTTTGTATCCTAG . . . CGGAGCTGGTCATCGATTCC-----CCTTC    |      |       |       |       |    |

|                                | 5' | THTUBF                                                                                      | 14 bp | THTUBP | 106 bp | THTUBR | 3' |
|--------------------------------|----|---------------------------------------------------------------------------------------------|-------|--------|--------|--------|----|
| <u><i>C. theobromicola</i></u> |    | CTTTTACCCGAGTTCCATGTTTACC . . . CGTCAATC--CGACCCCCTACTGCG . . . GCAGGGCTAAGGGCTAATC--TCTCGC |       |        |        |        |    |
| <i>C. aenigma</i>              |    | TTTTTTACCCGACTTCTATGCACAAC . . . TGTCAATCATCGACGCCCAACTCTG . . . GCGGGG-----CTAACC--TCCTTG  |       |        |        |        |    |
| <i>C. aeschynomenes</i>        |    | TTTTTTACCCGACTTCTATGCTCAAC . . . TGTCAATCATCGACGTCCAACCTCTG . . . GCGGGG-----CTAACC--TCCTTG |       |        |        |        |    |
| <i>C. alatae</i>               |    | TTTTTTACCCGACTTCCATGCTCACC . . . CGTCAACCATCGACTTCCTACTCTG . . . GCGGGG-----CTAACC--TCCTTG  |       |        |        |        |    |
| <i>C. alienum</i>              |    | TTTTTTACCCGACTTCTATGCACAAC . . . TGTCAATCATCGACGCCCAACTCTG . . . GCGGGG-----CTAACC--TCCTTG  |       |        |        |        |    |
| <i>C. aotearoa</i>             |    | GTTTTTAC-----CCATGCTCACC . . . CGTCAATCATCGACCTCCTACTCTG . . . GCGGGG-----CTAACC--TCTTTG    |       |        |        |        |    |



|                           |                                                                                                    |
|---------------------------|----------------------------------------------------------------------------------------------------|
| <i>C. asianum</i>         | TTTTTACCCGACTTCCATGCTCAAC...TGTCAATCATCGACCTCCA <b>ACTCTG</b> ...GCGGGG-----CTAACC--TC <b>CTTG</b> |
| <i>C. camelliae</i>       | GTTTTTAC-----CCATGATCACC...CGTCAATCATCGACCTCCTACTCTG...GCGGGG-----CTAACC--TCTTTG                   |
| <i>C. changpingense</i>   | TTTTTACCCGACTTCTATGCTCAAC...TGTCAATCATCGAC <b>GTCCA</b> ACTCTG...GCGGGG-----CTAACC--TC <b>CTTG</b> |
| <i>C. chrysophilum</i>    | TTTTTACCCGACTTCTATGCACAAC...TGTCAATCATCGACTCCCA <b>ACTCTG</b> ...GCGGGG-----CTAACC--TC <b>CTTG</b> |
| <i>C. cigarro</i>         | GTTTTTAC-----CCATGCTCACC...CGTCAATCATCGACCTCCTACTCTG...GCGGGG-----CTAACC--TCTTTG                   |
| <i>C. cordylinicola</i>   | GTTTTTAC-----CCATGCTCACC...CGTCAATCATCGACCTCCTACTCTG...GCGGGG-----CTAACC--TCTTTG                   |
| <i>C. endophyticum</i>    | TTTTTACCCGACTTCCATGCTCAAC...TCTCAATCATCGACCTCCTACTCCG...GCGGGG-----CTAACC--TC <b>CTTG</b>          |
| <i>C. fructicola</i>      | TTTTTACCCGACTTCTATGCACAAC...TGTCAATCATCGACGCCCA <b>ACTCTG</b> ...GCGGGG-----CTAACC--TC <b>CTTG</b> |
| <i>C. gloeosporioides</i> | TTTTTACCCGACCTCTTTGCTCAAC...TGTCAATCATCGACCTCCTAGTCTG...GCGGGG-----CTAACC--TC <b>CTTG</b>          |
| <i>C. grevilleae</i>      | CTTTCACCCGAGTTCCATGTTCAAC...CGTCAATC--CGACCCCTACTGCG...GCAGGG-----CTAATC--TCTCGC                   |
| <i>C. grossum</i>         | CTTTCACCCGAGTTCCATGTTCAAC...CGTCAATC--CGACCCCTACTGCG...GCAGGG-----CTAATC--TCTCGC                   |
| <i>C. henanense</i>       | GTTTTTAC-----CCATGCTCACC...CGTCAATCATCGACCTCCTACTCTG...GCGGGG-----CTAACC--TCTTTG                   |
| <i>C. horii</i>           | TTTTTACCCGACTTCCATGCTCAAC...CTTCAATTATCGACGTCTACTCTG...GCGGGG-----CTAACCAGAGTTCT                   |
| <i>C. jiangxiense</i>     | GTTTTTAC-----CCATGCTCACC...CGTCAATCATCGACCTCCTACTCTG...GCGGGG-----CTAACC--TCTTTG                   |
| <i>C. kahawae</i>         | GTTTTTAC-----CCATGCTCACC...CGTCAATCATCGACCTCCTACTCTG...GCGGGG-----CTAACC--TCTTTG                   |
| <i>C. musae</i>           | TT-----ATGCACAAC...TGTCAATCATCGACGCCCA <b>ACTCTG</b> ...GCGGGG-----CTAACC--TC <b>CTTG</b>          |
| <i>C. noveboracense</i>   | TTTTTACCCGACTTCTATGCACAAC...TGTCAATCATCGACGCCCA <b>ACTCTG</b> ...GCGGGG-----CTAACC--TC <b>CTTG</b> |
| <i>C. proteae</i>         | TTTTGACCCGACTTCCATGCTCAAC...TGTCAATCATCGACTCCATACTCTG...GCGGGG-----CTAACC--TCCGTG                  |
| <i>C. queenslandicum</i>  | TTTTTACCCGACTTCCATGCTCAAC...TGTCAATCATCGAC <b>GTCCA</b> ACTCTG...GCGGGG-----CTAACC--TC <b>CTTG</b> |
| <i>C. salsolae</i>        | TTTTTACCCGACTTCTATGCTCAAC...TGTTAATCATCGAC <b>GTCCA</b> ACTCTG...GCGGGG-----CTAACC--TC <b>CTCG</b> |
| <i>C. siamense</i>        | TTTTTACCCGACTTCTATGCTCAAC...TGTCAATCATCGAC <b>GTCCA</b> ACTCTG...GCGGGG-----CTAACC--TC <b>CTTG</b> |
| <i>C. tropicale</i>       | TTTTTACCCGATTTCTATGCTCAAC...TGTCAATCATCGAC <b>GTCCA</b> ACTCTG...GCGGGG-----CTAACC--TC <b>CTTG</b> |
| <i>C. viniferum</i>       | TTTTTACCCGACTTCTATGCACAAC...TGTCAATCATCGACGCCAA <b>ACTCTG</b> ...GCGGGG-----CTAACC--TC <b>CTTG</b> |
| <i>C. wuxiense</i>        | GTTTTTAC-----CCATGATCACC...CGTCAATCATCGACCTCCTACTCTG...GCGGGG-----CTAACC--TCTTTG                   |

**Figure S2.** Alignments of available *Colletotrichum* accessions at primer and probe sites for each primer-probe set. **Bold** indicates mismatches with the target species, “-” is a gap, and “...” is excluded sequence. For *C. chrysophilum* ladA, *C. fructicola* ladA, *C. gloeosporioides* GAPDH, *C. noveboracense* ladA, *C. nymphaeae* GAPDH, and *C. theobromicola* THTUB, accessions outside their species complex were excluded due to high sequence dissimilarity at these primer and probe sites.
